# Supplementary material for: Drosophila serotonin 2A receptor signaling coordinates central metabolic processes to modulate aging in response to nutrient choice
Source: eLife. 2021 Jan 19;10:e59399. doi: 10.7554/eLife.59399 (PMC7909950; doi:10.7554/eLife.59399)
Supplement: Figure 1—figure supplement 1—source data 1. [file elife-59399-fig1-figsupp1-data1.xlsx]

## Sheet: FigSupp1
Diet	Replicate	Weight (mg/fly)	TAG (ug/fly)	Protein (ug/fly)	TAG/Protein
CD	1	0.92	9.30823	85.4102	0.108983
CD	2	0.44	7.55032	53.3414	0.141547
CD	3	0.38	5.01487	45.6251	0.109915
CD	4	0.98	7.65174	50.2973	0.15213
CD	5	0.74	8.0236	49.4478	0.162264
CD	6	0.02	5.31912	51.3592	0.103567
CD	7	1.34	12.2494	52.9166	0.231484
CD	8	0.24	4.10211	51.7132	0.0793242
CD	9	1.12	4.23733	56.527	0.0749612
CD	10	1.24	5.21771	47.678	0.109436
CD	11	1.88	9.00398	48.1028	0.187182
CD	12	1.9	5.79241	49.0939	0.117986
FD S24Y3	1	1.54	10.0858	54.5449	0.184908
FD S24Y3	2	1.56	17.7935	33.9444	0.524197
FD S24Y3	3	1.3	18.4697	50.3681	0.366693
FD S24Y3	4	0.84	14.751	44.634	0.330488
FD S24Y3	5	0.62	18.4697	30.1924	0.611732
FD S24Y3	6	1.12	8.36166	44.4924	0.187935
FD S24Y3	7	0.3	15.3933	53.0582	0.290121
FD S24Y3	8	1.16	16.0356	50.5097	0.317476
FD S24Y3	9	0.6	7.95599	48.032	0.165639
FD S24Y3	10	1.36	10.2548	54.3325	0.188742
FD S24Y3	11	0.78	13.9735	78.9681	0.176951
FD S24Y3	12	1.56	7.75316	41.236	0.188019
FD S30Y3	1	0.28	11.5394	46.1206	0.250201
FD S30Y3	2	0.86	7.92219	41.6607	0.19016
FD S30Y3	3	1.14	15.6638	36.4221	0.430062
FD S30Y3	4	0.96	16.5427	33.8028	0.489389
FD S30Y3	5	0.64	14.3115	37.2008	0.38471
FD S30Y3	6	0.96	16.2385	40.882	0.397203
FD S30Y3	7	0.78	16.5427	54.3325	0.304472
FD S30Y3	8	2.22	11.4718	52.4919	0.218545
FD S30Y3	9	1.68	8.32786	48.1736	0.172872
FD S30Y3	10	0.3	9.81532	61.6241	0.159277
FD S30Y3	11	1.2	13.9735	44.8464	0.311585
FD S30Y3	12	1.42	12.1817	40.9528	0.297458
FD SY10	1	0.8	25.6027	57.5889	0.444577
FD SY10	2	1.52	14.6496	61.3409	0.238822
FD SY10	3	1.96	19.3824	57.0934	0.339486
FD SY10	4	0.92	15.4947	51.7132	0.299628
FD SY10	5	0.36	17.2864	51.1468	0.337977
FD SY10	6	1.78	16.9484	56.3854	0.300581
FD SY10	7	0.22	12.7903	108.276	0.118126
FD SY10	8	1.7	18.4359	61.4825	0.299855
FD SY10	9	0.86	15.0891	60.7038	0.248569
FD SY10	10	0.98	12.0465	60.8453	0.197986
FD SY10	11	1.1	14.7848	99.2854	0.148912
FD SY10	12	1	11.8099	72.0305	0.163957
