# Supplementary material for: Drosophila serotonin 2A receptor signaling coordinates central metabolic processes to modulate aging in response to nutrient choice
Source: eLife. 2021 Jan 19;10:e59399. doi: 10.7554/eLife.59399 (PMC7909950; doi:10.7554/eLife.59399)
Supplement: Figure 1—figure supplement 2—source data 1. [file elife-59399-fig1-figsupp2-data1.xlsx]

## Sheet: Replicate 1
Age (Hrs)	Control/CD_Survivorship	Control/FD_Survivorship	dFOXO94/CD_Survivorship	dFOXO94_/FD_Survivorship
13	1	1	1	1
26	1	1	1	1
62.25	1	1	1	1
112.07	1	0.99	1	1
184.11	0.99	0.99	0.98	0.99
232.23	0.99	0.99	0.98	0.99
279.41	0.98	0.99	0.97	0.99
351.89	0.94	0.99	0.85	0.99
399.97	0.91	0.99	0.77	0.98
445.57	0.84	0.99	0.71	0.96
520.01	0.69	0.99	0.69	0.94
568.2	0.6	0.98	0.67	0.88
640.82	0.48	0.96	0.64	0.84
688.14	0.42	0.96	0.6	0.82
734.57	0.36	0.96	0.52	0.74
782.53	0.32	0.94	0.47	0.67
853.98	0.27	0.91	0.3	0.58
901.75	0.26	0.9	0.24	0.53
949.23	0.22	0.86	0.19	0.5
1021.82	0.18	0.81	0.14	0.42
1069.65	0.11	0.76	0.1	0.35
1117.9	0.1	0.7	0.05	0.27
1190.7	0.06	0.61	0.03	0.18
1238.22	0.06	0.5	0.02	0.11
1286.28	0.03	0.46	0.02	0.08
1358.71	0.02	0.4	0.01	0.04
1406.81	0.02	0.34	0	0.03
1454.51	0.01	0.3	0	0.02
1525.91	0	0.18	0	0
1574.75	0	0.1	0	0
1627.94	0	0.07	0	0
1697.07	0	0.04	0	0
1743.44	0	0.01	0	0
1789.22	0	0	0	0

## Sheet: Replicate 2
Age (Hrs)	CT/FD_Survivorship	CT/CD_Survivorship	dFOXO94/FD_Survivorship	dFOXO94/CD_Survivorship
13	1	1	1	1
26	1	1	1	1
70.03	1	1	0.99	1
117.54	1	1	0.99	1
165.01	1	1	0.99	0.99
238.01	1	0.97	0.98	0.99
286.14	1	0.96	0.98	0.95
332.67	1	0.96	0.97	0.93
405.95	1	0.89	0.97	0.82
463.07	1	0.83	0.95	0.78
501.18	1	0.79	0.95	0.74
573.73	0.99	0.7	0.94	0.71
622.37	0.99	0.67	0.91	0.68
695.65	0.99	0.55	0.89	0.66
741.59	0.99	0.53	0.85	0.6
789.67	0.97	0.5	0.81	0.52
837.57	0.97	0.49	0.77	0.46
909.7	0.96	0.44	0.7	0.3
957.78	0.95	0.41	0.65	0.25
1004.59	0.95	0.37	0.61	0.17
1078.4	0.91	0.29	0.52	0.1
1127.14	0.89	0.27	0.41	0.07
1173.57	0.87	0.23	0.38	0.04
1225.27	0.83	0.2	0.31	0.02
1298.12	0.8	0.15	0.21	0.01
1365.08	0.72	0.09	0.14	0.01
1417.05	0.63	0.09	0.09	0
1465.67	0.57	0.08	0.07	0
1537.3	0.45	0.06	0.03	0
1581.78	0.38	0.05	0.01	0
1629.16	0.33	0.04	0	0
1678.14	0.25	0.01	0	0
1749.28	0.18	0	0	0
1797.25	0.13	0	0	0
1845.98	0.07	0	0	0
1917.5	0.02	0	0	0
1965.06	0.01	0	0	0
2013.02	0	0	0	0
