# Supplementary material for: Drosophila serotonin 2A receptor signaling coordinates central metabolic processes to modulate aging in response to nutrient choice
Source: eLife. 2021 Jan 19;10:e59399. doi: 10.7554/eLife.59399 (PMC7909950; doi:10.7554/eLife.59399)
Supplement: Figure 1—figure supplement 3—source data 1. [file elife-59399-fig1-figsupp3-data1.xlsx]

## Sheet: B
ID	Time	Diet	EggNo
1-A1	1	CD	39
1-A2	1	CD	45
1-A3	1	FD	24
1-A4	1	FD	23
2-A1	1	CD	25
2-A2	1	CD	19
2-A3	1	FD	4
2-A4	1	FD	28
3-A1	1	CD	37
3-A2	1	CD	42
3-A3	1	FD	30
3-A4	1	FD	15
4-A1	1	CD	39
4-A2	1	CD	30
4-A3	1	FD	38
4-A4	1	FD	17
1-A1	2	CD	19
1-A2	2	CD	20
1-A3	2	FD	18
1-A4	2	FD	18
2-A1	2	CD	6
2-A2	2	CD	11
2-A3	2	FD	27
2-A4	2	FD	20
3-A1	2	CD	6
3-A2	2	CD	15
3-A3	2	FD	31
3-A4	2	FD	7
4-A1	2	CD	10
4-A2	2	CD	18
4-A3	2	FD	20
4-A4	2	FD	10
1-A1	5	CD	7
1-A2	5	CD	8
1-A3	5	FD	3
1-A4	5	FD	5
2-A1	5	CD	4
2-A2	5	CD	5
2-A3	5	FD	10
2-A4	5	FD	13
3-A1	5	CD	11
3-A2	5	CD	6
3-A3	5	FD	18
3-A4	5	FD	13
4-A1	5	CD	17
4-A2	5	CD	19
4-A3	5	FD	16
4-A4	5	FD	12
1-A1	8	CD	12
1-A2	8	CD	10
1-A3	8	FD	25
1-A4	8	FD	15
2-A1	8	CD	7
2-A2	8	CD	1
2-A3	8	FD	16
2-A4	8	FD	12
3-A1	8	CD	8
3-A2	8	CD	3
3-A3	8	FD	25
3-A4	8	FD	1
4-A1	8	CD	8
4-A2	8	CD	5
4-A3	8	FD	6
4-A4	8	FD	14
