# Supplementary material for: Drosophila serotonin 2A receptor signaling coordinates central metabolic processes to modulate aging in response to nutrient choice
Source: eLife. 2021 Jan 19;10:e59399. doi: 10.7554/eLife.59399 (PMC7909950; doi:10.7554/eLife.59399)
Supplement: Figure 1—source data 1. [file elife-59399-fig1-data1.xlsx]

## Sheet: A
Age (Hrs)	Male/CD_Survivorship	Male/FD_Survivorship	Female/FD_Survivorship	Female/CD_Survivorship
13	1	1	1	1
26	1	1	1	1
46.98	1	1	1	0.99
94.71	1	1	1	0.99
142.5	1	1	1	0.99
214.86	1	1	1	0.99
286.31	0.99	0.99	1	0.99
335.16	0.94	0.99	0.99	0.99
384.31	0.91	0.99	0.99	0.99
455.29	0.84	0.99	0.99	0.98
502.88	0.75	0.99	0.98	0.97
550.41	0.68	0.98	0.97	0.94
622.82	0.59	0.97	0.96	0.92
670.98	0.52	0.93	0.96	0.87
718.9	0.44	0.89	0.95	0.81
785.67	0.39	0.88	0.92	0.77
838.88	0.36	0.84	0.87	0.74
886.7	0.3	0.8	0.84	0.73
958.83	0.2	0.65	0.76	0.67
1006.65	0.15	0.6	0.73	0.6
1054.77	0.12	0.5	0.67	0.52
1126.6	0.08	0.32	0.62	0.43
1174.38	0.06	0.25	0.59	0.34
1222.54	0.05	0.22	0.54	0.3
1295.21	0.03	0.13	0.36	0.22
1342.83	0.02	0.11	0.3	0.16
1390.6	0.02	0.06	0.23	0.14
1460.97	0.01	0.02	0.19	0.09
1511.89	0.01	0.01	0.15	0.07
1559.62	0.01	0.01	0.13	0.06
1630.18	0	0.01	0.04	0.03
1677.05	0	0	0	0

## Sheet: B
Age (Hrs)	In08/Male/CD_Survivorship	In08/Male/FD_Survivorship	Ln10/Male/CD_Survivorship	Ln10/Male/FD_Survivorship	In08/Female/CD_Survivorship	In08/Female/FD_Survivorship	Ln10/Female/CD_Survivorship	Ln10/Female/FD_Survivorship
13	1	1	1	1	1	1	1	1
26	1	1	1	1	1	1	1	1
70.26	1	1	1	1	1	1	0.99	1
116.75	1	1	0.99	1	1	1	0.99	0.99
189.82	1	1	0.97	0.97	1	1	0.98	0.99
237.86	1	1	0.97	0.95	1	1	0.97	0.97
285.34	1	1	0.95	0.95	1	1	0.97	0.97
358.15	1	1	0.95	0.94	1	1	0.97	0.97
405.65	0.99	0.99	0.93	0.94	1	1	0.96	0.97
452.83	0.98	0.99	0.92	0.93	1	0.99	0.96	0.97
525.8	0.97	0.99	0.91	0.93	1	0.99	0.94	0.96
573.84	0.97	0.99	0.9	0.91	1	0.97	0.91	0.96
620.8	0.97	0.99	0.88	0.9	1	0.97	0.89	0.95
694.05	0.97	0.99	0.87	0.88	0.99	0.95	0.87	0.93
751.18	0.97	0.99	0.84	0.87	0.97	0.95	0.85	0.92
789.31	0.97	0.98	0.8	0.83	0.96	0.94	0.83	0.88
861.81	0.94	0.97	0.74	0.79	0.94	0.93	0.75	0.81
910.47	0.93	0.97	0.67	0.75	0.92	0.91	0.72	0.76
966.33	0.91	0.96	0.56	0.72	0.92	0.84	0.64	0.63
1029.68	0.87	0.96	0.46	0.67	0.87	0.81	0.51	0.53
1077.7	0.82	0.95	0.4	0.62	0.83	0.76	0.46	0.45
1125.66	0.79	0.91	0.33	0.56	0.78	0.71	0.42	0.34
1197.81	0.72	0.89	0.27	0.5	0.74	0.61	0.32	0.28
1245.83	0.64	0.87	0.23	0.39	0.67	0.52	0.26	0.2
1292.7	0.56	0.84	0.21	0.37	0.62	0.43	0.2	0.16
1366.41	0.46	0.72	0.14	0.32	0.51	0.29	0.13	0.1
1415.2	0.34	0.62	0.1	0.29	0.42	0.21	0.08	0.09
1461.6	0.29	0.49	0.08	0.21	0.33	0.13	0.06	0.06
1513.23	0.19	0.4	0.05	0.16	0.31	0.09	0.04	0.05
1585.56	0.12	0.28	0.04	0.11	0.22	0.05	0.01	0.03
1652.8	0.07	0.22	0.04	0.08	0.15	0.03	0	0.03
1705.23	0.02	0.18	0.03	0.05	0.12	0.02	0	0.03
1753.87	0	0.12	0.02	0.01	0.07	0.02	0	0.03
1825.5	0	0.04	0	0.01	0.04	0.01	0	0.01
1869.88	0	0.02	0	0.01	0.01	0.01	0	0
1917.24	0	0	0	0	0.01	0	0	0
1966.28	0	0	0	0	0.01	0	0	0
2037.43	0	0	0	0	0	0	0	0

## Sheet: C
Diet	Smurf	Non-smurf	Total	% of Smurfs
CD	0	14	14	0
CD	0	13	13	0
CD	0	11	11	0
FD	0	25	25	0
FD	1	23	24	0.04
FD	0	22	22	0
CD	1	15	16	0.06
CD	0	18	18	0
CD	0	17	17	0
FD	0	24	24	0
FD	0	24	24	0
FD	1	24	25	0.04
CD	0	16	16	0
CD	0	16	16	0
CD	1	17	18	0.06
FD	0	25	25	0
FD	1	24	25	0.04
FD	3	21	24	0.13
CD	1	15	16	0.06
CD	1	17	18	0.06
CD	0	16	16	0
FD	1	24	25	0.04
FD	2	20	22	0.09
FD	2	19	21	0.1

## Sheet: D
Diet	TotalUpDist (mm/10sec)
CD	50.4485
CD	55.46
CD	14.1991
CD	42.9314
CD	33.5767
CD	64.3135
CD	47.7757
FD	68.4897
FD	67.6545
FD	22.5515
FD	65.6499
FD	62.3089
FD	43.4325
FD	31.405
FD	NA
FD	15.5355
FD	NA
FD	NA
FD	NA
FD	NA
FD	NA
CD	NA
CD	NA
CD	NA
CD	NA
CD	NA
CD	NA
CD	0
CD	23.0526
CD	3.34096
CD	33.5767
CD	64.1465
CD	67.8215
CD	27.0618
CD	23.9714
FD	51.4508
FD	71.9977
FD	6.51487
FD	41.4279
FD	13.5309
FD	58.2998
FD	62.1419
FD	NA
FD	NA
FD	NA
FD	NA
FD	NA
FD	NA
FD	NA
CD	NA
CD	NA
CD	NA
CD	NA
CD	NA
CD	NA
CD	72.3318

## Sheet: E
Group	Nutrient (ug/hr/fly)
CD/S	0.557804
CD/S	0.534116
CD/S	0.387224
CD/S	0.660481
CD/S	0.763303
CD/S	0.434272
CD/S	0.370309
CD/S	0.493554
CD/S	0.614426
CD/Y	0.0738964
CD/Y	0.111215
CD/Y	0.0440418
CD/Y	0.0206887
CD/Y	0.0167835
CD/Y	0.024385
CD/Y	0.0406416
CD/Y	0.0304812
CD/Y	0.0319212
FD/SY	0.0451437
FD/SY	0.0328299
FD/SY	0.0357464
FD/SY	0.040038
FD/SY	0.0349323
FD/SY	0.0367015
FD/SY	0.0296812
FD/SY	0.0398296
FD/SY	0.0268125

## Sheet: F
Diet	Nutrient (ug/hr/fly)
CD/S	1.04104
CD/S	0.828359
CD/S	1.21143
CD/S	1.04959
CD/S	0.630423
CD/S	0.8165
CD/S	0.987018
CD/S	2.46812
CD/Y	0.073056
CD/Y	0.0462405
CD/Y	0.140095
CD/Y	0.387452
CD/Y	0.378905
CD/Y	0.347915
CD/Y	0.0886984
CD/Y	0.169532
S24Y3/S	1.00125
S24Y3/S	0.727734
S24Y3/S	0.438126
S24Y3/S	1.50923
S24Y3/S	0.127066
S24Y3/S	0.27187
S24Y3/S	1.19432
S24Y3/S	0.66874
S30Y3/S	0.902963
S30Y3/S	1.60687
S30Y3/S	1.47191
S30Y3/S	1.47279
S30Y3/S	1.32982
S30Y3/S	1.2491
S30Y3/S	0.715255
S30Y3/S	1.23145
SY10/S	0.828359
SY10/S	0.309926
SY10/S	0.323334
SY10/S	0.813061
SY10/S	0.376965
SY10/S	0.233491
SY10/S	0.370261
SY10/S	0.44048
S24Y3/Y	0.125156
S24Y3/Y	0.0909667
S24Y3/Y	0.0547658
S24Y3/Y	0.188654
S24Y3/Y	0.0158833
S24Y3/Y	0.0339838
S24Y3/Y	0.14929
S24Y3/Y	0.0835924
S30Y3/Y	0.0902963
S30Y3/Y	0.160687
S30Y3/Y	0.147191
S30Y3/Y	0.147279
S30Y3/Y	0.132982
S30Y3/Y	0.12491
S30Y3/Y	0.0715255
S30Y3/Y	0.123145
SY10/Y	0.828359
SY10/Y	0.309926
SY10/Y	0.323334
SY10/Y	0.813061
SY10/Y	0.376965
SY10/Y	0.233491
SY10/Y	0.370261
SY10/Y	0.44048

## Sheet: G
Age (Hrs)	Male/FD_SY10_Survivorship	Male/CD_Survivorship	Male/HSFD1_Survivorship	Male/HSFD2_Survivorship
13	1	1	1	1
26	1	1	1	1
77.5	1	0.99	0.99	0.99
118.71	0.99	0.99	0.99	0.99
166.9	0.99	0.99	0.99	0.99
214.62	0.99	0.95	0.99	0.98
262.06	0.99	0.89	0.99	0.98
334.91	0.99	0.82	0.99	0.98
382.91	0.98	0.73	0.99	0.98
429.92	0.97	0.68	0.98	0.97
502.88	0.97	0.54	0.97	0.97
550.95	0.97	0.5	0.96	0.97
598.2	0.97	0.45	0.93	0.96
671.38	0.96	0.4	0.85	0.9
718.96	0.96	0.34	0.69	0.79
766.62	0.95	0.29	0.52	0.63
839.27	0.93	0.23	0.33	0.48
887.84	0.91	0.18	0.24	0.4
961.11	0.89	0.11	0.11	0.25
1007.19	0.79	0.1	0.07	0.2
1055.23	0.71	0.08	0.03	0.18
1103.14	0.63	0.05	0.02	0.08
1175.24	0.53	0.05	0	0.04
1223.35	0.45	0.04	0	0.03
1270.17	0.38	0.02	0	0.01
1343.96	0.24	0.01	0	0.01
1392.58	0.15	0.01	0	0.01
1438.97	0.1	0.01	0	0.01
1490.83	0.06	0	0	0.01
1562.95	0.03	0	0	0
1630.2	0.02	0	0	0
1682.08	0.01	0	0	0
1730.59	0	0	0	0

## Sheet: H
Diet	Replicate	Weight (mg/fly)	TAG (ug/fly)	Protein (ug/fly)	TAG/Protein
CD	1	0.92	9.30823	85.4102	0.108983
CD	2	0.44	7.55032	53.3414	0.141547
CD	3	0.38	5.01487	45.6251	0.109915
CD	4	0.98	7.65174	50.2973	0.15213
CD	5	0.74	8.0236	49.4478	0.162264
CD	6	0.02	5.31912	51.3592	0.103567
CD	7	1.34	12.2494	52.9166	0.231484
CD	8	0.24	4.10211	51.7132	0.0793242
CD	9	1.12	4.23733	56.527	0.0749612
CD	10	1.24	5.21771	47.678	0.109436
CD	11	1.88	9.00398	48.1028	0.187182
CD	12	1.9	5.79241	49.0939	0.117986
FD S24Y3	1	1.54	10.0858	54.5449	0.184908
FD S24Y3	2	1.56	17.7935	33.9444	0.524197
FD S24Y3	3	1.3	18.4697	50.3681	0.366693
FD S24Y3	4	0.84	14.751	44.634	0.330488
FD S24Y3	5	0.62	18.4697	30.1924	0.611732
FD S24Y3	6	1.12	8.36166	44.4924	0.187935
FD S24Y3	7	0.3	15.3933	53.0582	0.290121
FD S24Y3	8	1.16	16.0356	50.5097	0.317476
FD S24Y3	9	0.6	7.95599	48.032	0.165639
FD S24Y3	10	1.36	10.2548	54.3325	0.188742
FD S24Y3	11	0.78	13.9735	78.9681	0.176951
FD S24Y3	12	1.56	7.75316	41.236	0.188019
FD S30Y3	1	0.28	11.5394	46.1206	0.250201
FD S30Y3	2	0.86	7.92219	41.6607	0.19016
FD S30Y3	3	1.14	15.6638	36.4221	0.430062
FD S30Y3	4	0.96	16.5427	33.8028	0.489389
FD S30Y3	5	0.64	14.3115	37.2008	0.38471
FD S30Y3	6	0.96	16.2385	40.882	0.397203
FD S30Y3	7	0.78	16.5427	54.3325	0.304472
FD S30Y3	8	2.22	11.4718	52.4919	0.218545
FD S30Y3	9	1.68	8.32786	48.1736	0.172872
FD S30Y3	10	0.3	9.81532	61.6241	0.159277
FD S30Y3	11	1.2	13.9735	44.8464	0.311585
FD S30Y3	12	1.42	12.1817	40.9528	0.297458
FD SY10	1	0.8	25.6027	57.5889	0.444577
FD SY10	2	1.52	14.6496	61.3409	0.238822
FD SY10	3	1.96	19.3824	57.0934	0.339486
FD SY10	4	0.92	15.4947	51.7132	0.299628
FD SY10	5	0.36	17.2864	51.1468	0.337977
FD SY10	6	1.78	16.9484	56.3854	0.300581
FD SY10	7	0.22	12.7903	108.276	0.118126
FD SY10	8	1.7	18.4359	61.4825	0.299855
FD SY10	9	0.86	15.0891	60.7038	0.248569
FD SY10	10	0.98	12.0465	60.8453	0.197986
FD SY10	11	1.1	14.7848	99.2854	0.148912
FD SY10	12	1	11.8099	72.0305	0.163957

## Sheet: I
Age (Hrs)	w1118/LPFD_Survivorship	w1118/HPFD_Survivorship	w1118/LPCD_Survivorship	w1118/HPCD_Survivorship
13	1	1	1	1
20.76	1	1	1	1
26	1	1	1	1
61.46	1	1	1	0.99
109.18	1	1	1	0.99
159.62	1	1	0.99	0.99
208.25	1	1	0.9	0.94
277.37	1	0.99	0.39	0.7
325.68	0.99	0.98	0.17	0.56
376.16	0.98	0.98	0.1	0.46
428.92	0.96	0.97	0.06	0.43
472.02	0.94	0.96	0.05	0.38
519.1	0.94	0.96	0.05	0.33
588.55	0.94	0.95	0.05	0.21
657.52	0.92	0.89	0.01	0.14
687.33	0.91	0.88	0.01	0.12
759.18	0.86	0.84	0.01	0.07
807.52	0.8	0.8	0	0.01
855.72	0.79	0.77	0	0.01
926.34	0.72	0.65	0	0.01
975.83	0.68	0.63	0	0.01
1020.59	0.63	0.55	0	0
1094.62	0.51	0.34	0	0
1142.89	0.4	0.24	0	0
1189.19	0.29	0.2	0	0
1258.3	0.2	0.06	0	0
1334.62	0.11	0.02	0	0
1382.83	0.06	0	0	0
1411.55	0.04	0	0	0
1452.84	0.02	0	0	0
1502.14	0	0	0	0

## Sheet: J
Diet	Nutrient (ug/hr/fly)
S5Y5/S	1.26396
S5Y15/S	1.356
S5Y15/Y	0.142129
S5Y5/S	1.14767
S5Y5/Y	0.196324
S5Y15/S	1.19353
S5Y5/S	1.28827
S5Y5/Y	0.180634
S5Y15/S	1.04106
S5Y15/Y	0.0580492
S5Y5/S	0.789286
S5Y5/Y	0.110072
S5Y15/S	1.13542
S5Y15/Y	0.0736659
S5Y5/S	1.45866
S5Y15/S	1.02361
S5Y15/Y	0.0460166
S5Y5/S	1.13506
S5Y5/Y	0.245891
S5Y15/S	0.741479
S5Y15/Y	0.124828
S5Y5/S	0.915342
S5Y5/Y	0.119778
S5Y15/Y	0.222746
S5Y5/S	1.01831
S5Y15/S	1.11404
S5Y15/Y	0.0629939
S5Y5/Y	0.201155
S5Y15/S	1.21025
