# Supplementary material for: Drosophila serotonin 2A receptor signaling coordinates central metabolic processes to modulate aging in response to nutrient choice
Source: eLife. 2021 Jan 19;10:e59399. doi: 10.7554/eLife.59399 (PMC7909950; doi:10.7554/eLife.59399)
Supplement: Figure 2—figure supplement 1—source data 1. [file elife-59399-fig2-figsupp1-data1.xlsx]

## Sheet: FigSupp4
Age (Hrs)	Control/CD_Survivorship	Control/FD_Survivorship	Pirenperone/CD_Survivorship	Pirenperone/FD_Survivorship
13	1	1	1	1
26	1	1	1	1
70.48	0.98	1	1	0.99
119.25	0.98	1	1	0.99
167.26	0.98	1	1	0.99
233.2	0.98	1	0.99	0.98
284.95	0.97	1	0.99	0.98
334.79	0.97	0.99	0.98	0.97
400.73	0.97	0.98	0.98	0.97
448.79	0.97	0.98	0.98	0.97
501.81	0.97	0.98	0.97	0.97
569.73	0.96	0.98	0.96	0.97
619.53	0.96	0.98	0.94	0.97
672.25	0.93	0.98	0.93	0.97
738.96	0.89	0.97	0.91	0.96
784.53	0.85	0.96	0.9	0.94
841.21	0.78	0.95	0.87	0.93
908.42	0.76	0.92	0.82	0.89
955.88	0.7	0.89	0.81	0.85
1007.35	0.65	0.87	0.74	0.82
1072.76	0.57	0.77	0.67	0.73
1125.3	0.55	0.69	0.59	0.67
1171.87	0.45	0.6	0.53	0.6
1245.03	0.34	0.38	0.41	0.33
1294.72	0.29	0.31	0.35	0.26
1342.18	0.22	0.23	0.29	0.24
1413.21	0.12	0.18	0.16	0.18
1456.68	0.11	0.16	0.12	0.15
1505.39	0.08	0.14	0.1	0.11
1580.08	0.07	0.09	0.06	0.06
1624.77	0.05	0.08	0.04	0.03
1674.04	0.04	0.07	0.02	0.02
1749.12	0.01	0.03	0.01	0.02
1794.91	0.01	0.02	0.01	0.02
1842.12	0.01	0.01	0.01	0.01
1912.01	0	0	0	0
