# Supplementary material for: Drosophila serotonin 2A receptor signaling coordinates central metabolic processes to modulate aging in response to nutrient choice
Source: eLife. 2021 Jan 19;10:e59399. doi: 10.7554/eLife.59399 (PMC7909950; doi:10.7554/eLife.59399)
Supplement: Figure 2—source data 1. [file elife-59399-fig2-data1.xlsx]

## Sheet: A
Age (Hrs)	w1118/FD_Survivorship	w1118/CD_Survivorship	5-HT2A/FD_Survivorship	5-HT2A/CD_Survivorship
13	1	1	1	1
26	1	1	1	1
96.8	1	1	0.99	1
144.27	1	0.99	0.99	1
185.27	0.99	0.98	0.99	0.99
256.81	0.99	0.83	0.97	0.94
312.44	0.99	0.69	0.94	0.93
357.07	0.99	0.57	0.92	0.9
428.47	0.97	0.46	0.87	0.86
526.23	0.95	0.28	0.79	0.78
618.4	0.94	0.17	0.67	0.7
694.81	0.91	0.12	0.58	0.62
745.9	0.89	0.1	0.53	0.57
812.11	0.79	0.09	0.39	0.44
862.33	0.76	0.09	0.31	0.37
933.43	0.67	0.07	0.22	0.26
1000.05	0.58	0.07	0.18	0.2
1080.42	0.39	0.03	0.13	0.12
1147.01	0.31	0.03	0.07	0.04
1220.84	0.18	0.02	0.06	0.03
1288.61	0.15	0.01	0.06	0.01
1365.05	0.04	0	0.01	0.01
1435.25	0.01	0	0	0
1488.44	0.01	0	0	0
1562.75	0.01	0	0	0
1611.34	0	0	0	0
1654.67	0	0	0	0
1702.37	0	0	0	0
1770.33	0	0	0	0
1823.37	0	0	0	0
1867.96	0	0	0	0

## Sheet: B
Age (Hrs)	GAL4_x_w1118_FD_Survivorship	GAL4_x_w1118_CD_Survivorship	GAL4_x_UAS-5HT2A_RNAi_TRiP_FD_Survivorship	GAL4_x_UAS-5HT2A_RNAi_TRiP_CD_Survivorship	GAL4_x_UAS-5HT2A_RNAi_KK_FD_Survivorship	GAL4_x_UAS-5HT2A_RNAi_KK_CD_Survivorship
13	1	1	1	1	1	1
26	1	1	1	1	1	1
45.4	1	1	1	1	1	0.99
117.86	1	1	0.99	1	1	0.98
164.66	1	0.99	0.99	1	1	0.97
212.44	0.99	0.99	0.99	1	1	0.97
284.72	0.99	0.99	0.99	1	1	0.97
332.54	0.99	0.99	0.99	1	1	0.97
380.63	0.99	0.99	0.99	1	1	0.97
453.41	0.99	0.99	0.99	1	1	0.97
500.92	0.99	0.99	0.99	1	1	0.97
548.97	0.99	0.99	0.99	1	1	0.97
621.41	0.99	0.97	0.99	1	1	0.97
669.45	0.99	0.97	0.99	1	0.99	0.97
717.22	0.99	0.95	0.99	1	0.99	0.97
788.5	0.99	0.95	0.98	1	0.99	0.97
837.47	0.99	0.95	0.98	0.99	0.99	0.97
890.8	0.99	0.93	0.98	0.99	0.99	0.97
959.77	0.98	0.88	0.97	0.99	0.99	0.96
1006.15	0.97	0.86	0.95	0.99	0.99	0.95
1052.05	0.95	0.8	0.93	0.97	0.99	0.95
1125.64	0.94	0.71	0.91	0.93	0.95	0.93
1176.69	0.91	0.59	0.84	0.91	0.94	0.91
1220.41	0.89	0.5	0.81	0.9	0.91	0.86
1293.75	0.79	0.35	0.76	0.77	0.83	0.77
1341.58	0.74	0.29	0.71	0.71	0.77	0.67
1395.24	0.69	0.2	0.65	0.62	0.72	0.53
1461.78	0.59	0.16	0.57	0.47	0.59	0.36
1509.38	0.46	0.07	0.47	0.35	0.48	0.24
1556.57	0.36	0.03	0.38	0.19	0.39	0.18
1629.25	0.24	0.01	0.2	0.12	0.24	0.11
1677.65	0.17	0.01	0.14	0.1	0.17	0.05
1724.96	0.11	0	0.09	0.08	0.12	0.03
1797.72	0.02	0	0.03	0.06	0.05	0.02
1845.26	0.01	0	0.02	0.02	0.03	0.01
1901.01	0	0	0.01	0.01	0	0
1949.87	0	0	0	0.01	0	0
2013.54	0	0	0	0.01	0	0
2060.06	0	0	0	0	0	0

## Sheet: C
Age (Hrs)	Control/FD_Survivorship	Control/CD_Survivorship	Pirenperone/FD_Survivorship	Pirenperone/CD_Survivorship
13	1	1	1	1
26	1	1	1	1
40.26	1	1	1	1
87.36	1	1	1	1
135.58	1	1	1	1
210.3	1	1	1	0.99
258.18	1	1	1	0.99
306.32	1	0.99	1	0.99
378.99	1	0.99	1	0.99
423.73	1	0.99	1	0.99
476.79	1	0.98	1	0.98
544.65	1	0.97	1	0.97
594.1	1	0.97	0.99	0.97
640.06	0.99	0.95	0.99	0.97
712.07	0.98	0.94	0.98	0.95
760.06	0.97	0.89	0.98	0.95
810.31	0.97	0.87	0.94	0.93
878.71	0.94	0.81	0.92	0.91
927.48	0.92	0.75	0.88	0.87
975.74	0.92	0.69	0.83	0.82
1047.75	0.83	0.61	0.76	0.72
1099.22	0.79	0.55	0.74	0.62
1144.79	0.76	0.47	0.7	0.57
1218.67	0.72	0.33	0.62	0.46
1263.24	0.64	0.26	0.49	0.39
1312.09	0.52	0.19	0.38	0.31
1387.07	0.41	0.14	0.23	0.19
1435	0.29	0.11	0.19	0.13
1479.92	0.26	0.06	0.13	0.11
1553.77	0.18	0.04	0.08	0.05
1601.94	0.1	0.04	0.06	0.05
1650.98	0.06	0.01	0.04	0.02
1721.19	0.04	0	0.01	0.01
1768.25	0.02	0	0	0
1815.97	0.01	0	0	0
1886.91	0.01	0	0	0

## Sheet: D
Group	Nutrient (ug/hr/fly)
w1118/S	0.5559
w1118/Y	0.0791017
w1118/SY	0.179448
5-HT2A/S	1.01679
5-HT2A/Y	0.0961016
5-HT2A/SY	0.241571
w1118/S	0.672208
w1118/Y	0.049754
w1118/SY	0.171053
5-HT2A/S	0.619346
5-HT2A/Y	0.0980367
5-HT2A/SY	0.233176
w1118/S	0.621209
w1118/Y	0.0273065
w1118/SY	0.164525
5-HT2A/S	0.81732
5-HT2A/Y	0.0979905
5-HT2A/SY	0.280188
w1118/S	0.419545
w1118/Y	0.0167689
w1118/SY	0.104081
5-HT2A/S	0.65332
5-HT2A/Y	0.0552017
5-HT2A/SY	0.168585
w1118/S	0.390766
w1118/Y	0.0466593
w1118/SY	0.159992
5-HT2A/S	0.954572
5-HT2A/Y	0.0177636
5-HT2A/SY	0.215101
w1118/S	0.457678
w1118/Y	0.0281021
w1118/SY	0.126215
5-HT2A/S	0.639391
5-HT2A/Y	0.0576175
5-HT2A/SY	0.181068
w1118/S	0.493421
w1118/Y	0.0330594
w1118/SY	0.14437
5-HT2A/S	0.666358
5-HT2A/Y	0.0526575
5-HT2A/SY	0.202954
w1118/S	0.244613
w1118/Y	0.0277993
w1118/SY	0.123467
5-HT2A/S	0.552878
5-HT2A/Y	0.0388827
5-HT2A/SY	0.0731323
w1118/S	0.334806
w1118/Y	0.042126
w1118/SY	0.0828795
5-HT2A/S	0.539278
5-HT2A/Y	0.0515451
5-HT2A/SY	0.10893
w1118/S	0.621915
w1118/Y	0.011904
w1118/SY	0.075401
5-HT2A/S	0.762973
5-HT2A/Y	0.0652757
5-HT2A/SY	0.243671
w1118/S	0.888157
w1118/Y	0.0117192
w1118/SY	0.0535227
5-HT2A/S	0.800678
5-HT2A/Y	0.0854237
5-HT2A/SY	0.090402
w1118/S	0.332211
w1118/Y	0.0321167
w1118/SY	0.0942127
5-HT2A/S	0.710012
5-HT2A/Y	0.0998794
5-HT2A/SY	0.178909

## Sheet: E
Chamber_ID	Tracker_ID	Group	S	Y	None	PI
C1	T1	w1118	1994	17813	1759	0.798657
C1	T2	w1118	1	21536	1	0.999907
C1	T3	w1118	300	17919	272	0.967067
C1	T4	5-HT2A	364	20208	996	0.964612
C1	T5	5-HT2A	813	8733	12018	0.829667
C1	T6	5-HT2A	418	16881	4233	0.951674
C2	T1	w1118	1014	20107	453	0.903982
C2	T2	w1118	861	15181	5504	0.892657
C2	T3	w1118	1086	19375	1113	0.893847
C2	T4	5-HT2A	108	20998	468	0.989766
C2	T5	5-HT2A	529	18340	2698	0.943929
C2	T6	5-HT2A	584	14597	6393	0.923062
C3	T1	5-HT2A	246	20297	875	0.97605
C3	T2	5-HT2A	1	21465	1	0.999907
C3	T3	5-HT2A	812	17618	2779	0.911883
C3	T4	w1118	798	19786	927	0.922464
C3	T5	w1118	214	20724	574	0.979559
C3	T6	w1118	2198	13446	5865	0.718998
C4	T1	5-HT2A	475	17817	2456	0.948065
C4	T2	5-HT2A	1	20561	85	0.999903
C4	T3	5-HT2A	194	18481	2058	0.979224
C4	T4	w1118	17609	2647	1221	-0.738645
C4	T5	w1118	349	13090	59	0.948062
C4	T6	w1118	1851	18813	813	0.820848
C5	T1	w1118	805	20397	372	0.924064
C5	T2	w1118	428	19952	359	0.957998
C5	T3	w1118	4641	10224	6710	0.37558
C5	T4	5-HT2A	371	19433	1357	0.962533
C5	T5	5-HT2A	1	21503	1	0.999907
C5	T6	5-HT2A	22	21471	67	0.997953
C6	T1	w1118	2318	16057	3199	0.747701
C6	T2	w1118	2854	16935	1785	0.711557
C6	T3	w1118	1832	18644	1076	0.821059
C6	T4	5-HT2A	6599	338	14533	-0.902552
C6	T5	5-HT2A	237	14250	6469	0.967281
C6	T6	5-HT2A	71	20560	651	0.993117
C7	T1	5-HT2A	1	19365	1	0.999897
C7	T2	5-HT2A	1	21569	1	0.999907
C7	T3	5-HT2A	237	7227	13963	0.936495
C7	T4	w1118	597	12453	8524	0.908506
C7	T5	w1118	14	21168	28	0.998678
C7	T6	w1118	4867	12852	3855	0.450646
C8	T1	5-HT2A	106	21225	175	0.990061
C8	T2	5-HT2A	838	2816	17751	0.541325
C8	T3	5-HT2A	20935	619	1	-0.942563
C8	T4	w1118	1	21118	1	0.999905
C8	T5	w1118	640	20300	633	0.938873
C8	T6	w1118	1031	18777	1767	0.895901

## Sheet: F-G
Chamber	ID	ObsMinutes	TotalDist_mm	PercSleeping	PercWalking	PercMicroMoving	PercResting	AvgSpeed
1	0	359.6	1221.59	0.904365	0.00472616	0.0439255	0.0469836	0.056602
1	1	359.6	1596.71	0.909369	0.0150125	0.0264109	0.0492077	0.073988
1	2	359.6	5468.91	0.809008	0.0517098	0.102029	0.0372533	0.253401
1	3	359.6	1454.84	0.790381	0.00639422	0.0505977	0.152627	0.0674099
1	4	359.6	731.623	0.928274	0.00417014	0.0191827	0.0483736	0.0338997
1	5	359.6	477.635	0.915763	0	0.0102863	0.0739505	0.0221358
2	0	359	8450.48	0.373155	0.0829852	0.176552	0.367307	0.392464
2	1	359.2	2472.57	0.788478	0.0364598	0.0283885	0.146674	0.115171
2	2	358.7	4295.94	0.696767	0.0395764	0.100334	0.163322	0.199551
2	3	311.2	206.748	0.964022	0.0019274	0.00546097	0.0285898	0.0110691
2	4	359.2	1641.87	0.798712	0.00615901	0.0593505	0.135778	0.0745571
2	5	346.8	408.362	0.892764	0.00172961	0.00835976	0.0971462	0.0196244
4	0	333.9	2224.91	0.597904	0.00389222	0.111377	0.286826	0.111043
4	1	354.9	573.858	0.879718	0.00084507	0.023662	0.0957746	0.0269483
4	2	352	9.27731	0.999716	0	0	0.00028401	0.000439142
4	3	347.8	516.868	0.805116	0.000574878	0.0178212	0.176487	0.0247613
4	4	354.5	1682.82	0.871122	0.00902425	0.0445572	0.0752961	0.0792974
4	5	331.9	394.911	0.948494	0.00662651	0.00180723	0.0430723	0.0198249
5	0	359.5	5483.43	0.860122	0.0636819	0.0603448	0.0158509	0.254198
5	1	328.9	813.716	0.944681	0.00577508	0.0212766	0.0282675	0.0412217
5	2	358.8	2338.14	0.742268	0.019504	0.0565617	0.181666	0.108718
5	3	355.4	423.174	0.823066	0.000281294	0.0104079	0.166245	0.0198563
5	4	359.3	1611.73	0.801614	0.00639955	0.0492487	0.142738	0.0747419
5	5	357.6	1944.99	0.804305	0.00615041	0.0779983	0.111546	0.0906293
6	0	339.4	2184.31	0.847717	0.0194404	0.055081	0.0777614	0.107237
6	1	332.5	3098.45	0.649128	0.0339747	0.055021	0.261876	0.155275
6	2	359.2	6705.56	0.627609	0.0564987	0.150571	0.165321	0.311163
6	3	353.8	733.906	0.825374	0.000847697	0.0231704	0.150608	0.0345628
6	4	359	1909.35	0.72264	0.0075188	0.0609858	0.208855	0.0886469
6	5	358.4	332.936	0.948396	0.00027894	0.0041841	0.0471409	0.0154782
7	0	358	5128.95	0.327841	0.0212231	0.204691	0.446244	0.238921
7	1	358.4	1830.61	0.728312	0.0114365	0.0451883	0.215063	0.0851115
7	2	351.6	1314.62	0.834518	0.00568666	0.0398067	0.119989	0.0622984
7	3	318.6	1872.96	0.903357	0.0175714	0.0379667	0.0411045	0.0979529
7	4	345.8	3256.31	0.833767	0.0297774	0.0696733	0.0667823	0.156905
7	5	359.2	552.751	0.980239	0.00389647	0.00751461	0.00834957	0.0256402
8	0	353.3	717.392	0.949632	0.000848896	0.0212224	0.0282965	0.0338376
8	1	345.1	1417.79	0.926419	0.0124565	0.0220162	0.0391078	0.0684526
8	2	357.6	1926.21	0.847358	0.00587084	0.0735253	0.0732457	0.0897692
8	3	333.3	2353.47	0.747151	0.0203959	0.0491902	0.183263	0.11765
8	4	327	4701.41	0.747478	0.0467747	0.103332	0.102415	0.23955
8	5	326.5	4449.65	0.763931	0.0581751	0.0618494	0.116044	0.22707

## Sheet: H
Treatment	DFM	Chamber	Licks	LogLicks
5-HT2A CD	9	2	95	1.97772
5-HT2A CD	9	3	160	2.20412
5-HT2A CD	9	4	21	1.32222
5-HT2A CD	11	1	10	1
5-HT2A CD	11	2	147	2.16732
5-HT2A CD	15	6	18	1.25527
5-HT2A CD	15	7	37	1.5682
5-HT2A CD	15	8	45	1.65321
5-HT2A CD	16	5	39	1.59106
5-HT2A CD	16	6	24	1.38021
5-HT2A CD	16	7	203	2.3075
5-HT2A CD	16	8	5	0.69897
5-HT2A CD	18	11	76	1.88081
5-HT2A CD	19	9	77	1.88649
5-HT2A CD	19	10	69	1.83885
5-HT2A CD	19	11	3	0.477121
5-HT2A CD	19	12	404	2.60638
5-HT2A FD	9	6	92	1.96379
5-HT2A FD	11	5	22	1.34242
5-HT2A FD	11	8	7	0.845098
5-HT2A FD	15	9	50	1.69897
5-HT2A FD	15	10	103	2.01284
5-HT2A FD	15	12	55	1.74036
5-HT2A FD	16	9	424	2.62737
5-HT2A FD	16	10	13	1.11394
5-HT2A FD	16	12	334	2.52375
5-HT2A FD	18	1	19	1.27875
5-HT2A FD	18	2	357	2.55267
5-HT2A FD	18	3	43	1.63347
5-HT2A FD	18	4	199	2.29885
5-HT2A FD	19	1	251	2.39967
5-HT2A FD	19	2	19	1.27875
5-HT2A FD	19	4	320	2.50515
w1118 CD	1	1	203	2.3075
w1118 CD	1	2	118	2.07188
w1118 CD	1	3	77	1.88649
w1118 CD	2	2	61	1.78533
w1118 CD	2	4	123	2.08991
w1118 CD	3	5	18	1.25527
w1118 CD	3	6	32	1.50515
w1118 CD	3	7	37	1.5682
w1118 CD	3	8	30	1.47712
w1118 CD	5	6	180	2.25527
w1118 CD	5	7	87	1.93952
w1118 CD	7	9	139	2.14301
w1118 CD	7	10	83	1.91908
w1118 CD	7	11	229	2.35984
w1118 CD	7	12	326	2.51322
w1118 CD	8	9	28	1.44716
w1118 CD	8	10	13	1.11394
w1118 CD	8	11	35	1.54407
w1118 CD	8	12	111	2.04532
w1118 FD	1	5	63	1.79934
w1118 FD	1	6	80	1.90309
w1118 FD	1	7	30	1.47712
w1118 FD	1	8	22	1.34242
w1118 FD	2	5	46	1.66276
w1118 FD	2	6	30	1.47712
w1118 FD	2	7	58	1.76343
w1118 FD	2	8	10	1
w1118 FD	3	9	225	2.35218
w1118 FD	3	10	32	1.50515
w1118 FD	3	11	16	1.20412
w1118 FD	3	12	114	2.0569
w1118 FD	5	10	82	1.91381
w1118 FD	5	11	197	2.29447
w1118 FD	5	12	37	1.5682
w1118 FD	7	1	32	1.50515
w1118 FD	7	3	64	1.80618
w1118 FD	7	4	27	1.43136
w1118 FD	8	1	15	1.17609
w1118 FD	8	2	65	1.81291
w1118 FD	8	3	3	0.477121

## Sheet: I
Age (Hrs)	w1118/FD_Survivorship	w1118/CD_Survivorship	5-HT2A/FD_Survivorship	5-HT2A/CD_Survivorship
1	1	1	1	1
2	1	1	1	1
7.42	1	0.93	1	1
24.13	0.99	0.75	0.99	0.83
27.3	0.89	0.55	0.95	0.76
31.13	0.8	0.37	0.84	0.67
33.27	0.66	0.17	0.72	0.58
36.85	0.56	0.11	0.57	0.42
39.32	0.33	0.07	0.36	0.31
52.32	0.01	0	0.08	0.01
55.66	0	0	0.07	0
71.63	0	0	0	0

## Sheet: J
Group	Genotype	Diet	TAG Amount (ug/fly)	Protein Amount (ug/fly)	Protein / TAG
w1118/FD	w1118	FD	10.605	52.395	4.94059
w1118/FD	w1118	FD	11.905	68.195	5.72827
w1118/FD	w1118	FD	12.655	66.495	5.25444
w1118/FD	w1118	FD	17.605	59.145	3.35956
w1118/FD	w1118	FD	11.605	61.695	5.31624
w1118/FD	w1118	FD	12.505	50.795	4.06198
5-HT2A/FD	5-HT2A	FD	18.255	72.095	3.94933
5-HT2A/FD	5-HT2A	FD	16.655	74.595	4.47884
5-HT2A/FD	5-HT2A	FD	17.905	73.745	4.11868
5-HT2A/FD	5-HT2A	FD	16.555	75.795	4.57838
5-HT2A/FD	5-HT2A	FD	17.055	76.195	4.4676
5-HT2A/FD	5-HT2A	FD	21.955	78.245	3.56388
w1118/CD	w1118	CD	9.955	48.595	4.88147
w1118/CD	w1118	CD	9.705	54.095	5.57393
w1118/CD	w1118	CD	6.205	52.195	8.41176
w1118/CD	w1118	CD	6.355	45.045	7.08812
w1118/CD	w1118	CD	6.855	50.345	7.34427
w1118/CD	w1118	CD	9.705	61.695	6.35703
5-HT2A/CD	5-HT2A	CD	15.955	73.695	4.61893
5-HT2A/CD	5-HT2A	CD	22.555	60.995	2.70428
5-HT2A/CD	5-HT2A	CD	12.005	48.045	4.00208
5-HT2A/CD	5-HT2A	CD	17.705	67.995	3.84044
5-HT2A/CD	5-HT2A	CD	17.005	71.345	4.19553
5-HT2A/CD	5-HT2A	CD	16.955	72.345	4.26688
