# Supplementary material for: Drosophila serotonin 2A receptor signaling coordinates central metabolic processes to modulate aging in response to nutrient choice
Source: eLife. 2021 Jan 19;10:e59399. doi: 10.7554/eLife.59399 (PMC7909950; doi:10.7554/eLife.59399)
Supplement: Figure 3—source data 1. [file elife-59399-fig3-data1.xlsx]

## Sheet: A-B
Age (Hrs)	w1118/FD_lnux	w1118/FDtoCD_lnux	w1118/CD_lnux	w1118/CDtoFD_lnux
17.35	NA	NA	NA	-7.6
23.85	NA	NA	NA	NA
47.64	NA	-8.45	-9.24	-8.39
93.71	NA	NA	-8.66	-8.5
142.54	NA	-9.26	-8.25	-7.38
187.19	-8.86	NA	-7.53	-7.87
233.39	NA	-8.62	-6.64	-7.4
295.04	NA	NA	-6.48	-6.62
355	NA	-9.24	-8.03	-6.67
417.24	-9.49	-9.68	-6.97	-6.06
476.43	NA	NA	-6.48	-6.54
520.68	-8.98	-9.18	-6.32	-7.84
569.27	-8.38	-7.32	-5.52	-7.22
630.27	NA	-5.78	-6.3	-7.51
689.3	-8.99	-5.34	-7.13	-8.46
736.33	-7.58	-5.53	-6.25	-7.75
796.78	-7.31	-5.43	-5.87	-8.19
857.05	-7.79	-6.55	-7.06	-7.29
906.45	-6.77	-7.13	-6.27	-7.37
967.12	-6.04	-5.58	-6.6	-6.75
1024.45	-5.79	-5.41	-6.09	-6.6
1070.78	-5.89	-5.33	-6.2	-5.95
1131.33	-6.48	-5.77	-5.92	-5.96
1192.47	-5.21	-5.08	-4.75	-4.96
1239.6	-6.49	-6.63	-5.93	NA
1297.58	-5.56	-5.82	NA	-5.66
1359.64	-3.96	-4.25	-3.82	-3.74
1412.69	-4.41	-4.85	-4.11	-3.97
1460.22	-4.85	-3.44	NA	-3.67
1519.21	-4.99	NA	NA	NA

## Sheet: C-D
Age (Hrs)	5-HT2A/FD_lnux	5-HT2A/FDtoCD_lnux	5-HT2A/CD_lnux	5-HT2A/CDtoFD_lnux
17.35	NA	-7.78	NA	NA
23.85	NA	NA	NA	NA
47.64	NA	-7.99	-8.27	-8.63
93.71	NA	-8.79	-9.48	-9.44
142.54	-8.83	-8.78	-9.48	-8.74
187.19	-8.64	-8.18	-8.59	-7.84
233.39	-8.88	-7.84	-7.91	-8.01
295.04	-7.79	-7.25	-8.03	-7.48
355	-7.85	-7.52	-7.1	-6.76
417.24	-7.16	-7.52	-7.09	-6.85
476.43	-6.84	-6.7	-6.44	-6.41
520.68	-7.08	-6.27	-5.65	-7.21
569.27	-7.14	-5.92	-6.54	-6.99
630.27	-5.75	-5.96	-5.9	-6.1
689.3	-5.41	-5.58	-5.32	-5.24
736.33	-5.66	-4.84	-5.14	-5.56
796.78	-5.8	-5.16	-5.05	-5.7
857.05	-6.76	-5.61	-5.61	-5.72
906.45	-5.42	-5.05	-5.26	-4.97
967.12	-4.49	-4.05	-4.08	-4.46
1024.45	-4.6	-4.72	-4.19	-4.94
1070.78	-4.82	-3.76	-3.94	-3.9
1131.33	-4.67	-4.67	NA	-5.55
1192.47	-4.24	NA	NA	-4.78
1239.6	-4.73	NA	NA	NA
1297.58	NA	NA	NA	NA
1359.64	NA	NA	NA	NA
1412.69	NA	NA	NA	NA
