# Supplementary material for: Drosophila serotonin 2A receptor signaling coordinates central metabolic processes to modulate aging in response to nutrient choice
Source: eLife. 2021 Jan 19;10:e59399. doi: 10.7554/eLife.59399 (PMC7909950; doi:10.7554/eLife.59399)
Supplement: Figure 5—figure supplement 1—source data 1. [file elife-59399-fig5-figsupp1-data1.xlsx]

## Sheet: A
Age (Hrs)	CD/RU_minus_Survivorship	CD/RU_plus_Survivorship	FD/RU_minus_Survivorship	FD/RU_plus_Survivorship
13	1	1	1	1
26	1	1	1	1
93.9	1	1	1	1
165.27	0.99	1	1	1
213.78	0.99	1	0.99	1
286.45	0.99	1	0.99	1
332.64	0.99	1	0.99	1
380.78	0.99	1	0.99	1
428.7	0.99	0.99	0.99	1
500.79	0.99	0.99	0.99	1
548.87	0.99	0.99	0.99	1
595.67	0.99	0.99	0.98	1
669.78	0.99	0.99	0.98	1
718.14	0.99	0.99	0.98	1
764.99	0.99	0.99	0.97	1
816.34	0.95	0.98	0.97	1
888.48	0.95	0.9	0.97	1
955.72	0.95	0.84	0.97	0.95
1007.29	0.91	0.81	0.92	0.87
1056.08	0.86	0.72	0.91	0.81
1127.71	0.84	0.56	0.85	0.77
1172.58	0.77	0.53	0.83	0.74
1219.93	0.71	0.47	0.81	0.68
1268.92	0.61	0.38	0.78	0.61
1340.06	0.51	0.32	0.69	0.47
1388.02	0.44	0.21	0.64	0.37
1436.77	0.35	0.16	0.57	0.3
1508.48	0.26	0.09	0.5	0.24
1555.86	0.21	0.06	0.38	0.21
1603.8	0.14	0.05	0.33	0.13
1676.14	0.05	0.01	0.22	0.08
1723.81	0.03	0.01	0.18	0.05
1772.53	0.01	0.01	0.13	0.05
1844.2	0	0.01	0.06	0.01
1891.86	0	0	0	0.01
1939.99	0	0	0	0.01
2011.57	0	0	0	0

## Sheet: B
Group	Nutrient (ug/hr/fly)
CT_RUPLUS_CD/S	0.648318
CT_RUMINUS_CD/S	1.21457
CT_RUPLUS_FD	0.172962
CT_RUMINUS_FD	0.185317
CT_RUPLUS_CD/Y	0.257825
CT_RUPLUS_CD/S	1.07036
CT_RUMINUS_CD/S	0.965584
CT_RUPLUS_FD	0.283442
CT_RUMINUS_FD	0.174899
CT_RUPLUS_CD/Y	0.177507
CT_RUMINUS_CD/Y	0.254758
CT_RUPLUS_CD/S	0.726783
CT_RUMINUS_CD/S	0.995386
CT_RUPLUS_FD	0.18953
CT_RUMINUS_FD	0.214925
CT_RUPLUS_CD/Y	0.193922
CT_RUMINUS_CD/Y	0.309572
CT_RUPLUS_FD	0.250119
CT_RUMINUS_FD	0.2096
CT_RUPLUS_CD/Y	0.342346
CT_RUMINUS_CD/Y	0.191068
CT_RUPLUS_CD/S	0.876101
CT_RUMINUS_CD/S	0.818291
CT_RUPLUS_FD	0.195589
CT_RUMINUS_FD	0.216795
CT_RUPLUS_CD/Y	0.239516
CT_RUMINUS_CD/Y	0.21599
CT_RUPLUS_CD/S	0.950015
CT_RUMINUS_CD/S	0.961213
CT_RUPLUS_FD	0.138553
CT_RUMINUS_FD	0.274354
CT_RUPLUS_CD/Y	0.164984
CT_RUMINUS_CD/Y	0.13313
CT_RUPLUS_CD/S	0.772153
CT_RUMINUS_CD/S	0.693932
CT_RUPLUS_FD	0.263278
CT_RUMINUS_FD	0.169838
CT_RUPLUS_CD/Y	0.234167
CT_RUMINUS_CD/Y	0.23465
CT_RUPLUS_CD/S	0.714215
CT_RUMINUS_CD/S	0.811789
CT_RUPLUS_FD	0.163803
CT_RUMINUS_FD	0.146038
CT_RUPLUS_CD/Y	0.162265
CT_RUMINUS_CD/Y	0.189151
CT_RUPLUS_CD/S	0.479771
CT_RUMINUS_CD/S	0.831867
CT_RUPLUS_FD	0.0820792
CT_RUMINUS_FD	0.148873
CT_RUPLUS_CD/Y	0.148632
CT_RUMINUS_CD/Y	0.2025
