# Supplementary material for: Drosophila serotonin 2A receptor signaling coordinates central metabolic processes to modulate aging in response to nutrient choice
Source: eLife. 2021 Jan 19;10:e59399. doi: 10.7554/eLife.59399 (PMC7909950; doi:10.7554/eLife.59399)
Supplement: Figure 5—figure supplement 2—source data 1. [file elife-59399-fig5-figsupp2-data1.xlsx]

## Sheet: FigSupp9
Group	TAG Amount (ug/fly)	Protein Amount (ug/fly)	TAG / Protein
FD/RU-	18.0976	66.2625	0.27312
FD/RU-	19.4565	68.8361	0.282649
FD/RU-	22.8537	62.3706	0.366418
FD/RU-	29.7047	61.994	0.479155
FD/RU-	26.6472	59.3575	0.448927
FD/RU-	26.9303	62.81	0.428758
FD/RU+	20.3624	62.1823	0.327463
FD/RU+	15.7762	68.8989	0.228976
FD/RU+	18.3241	59.0437	0.310348
FD/RU+	16.2291	65.7603	0.246792
FD/RU+	16.9086	58.9181	0.286984
FD/RU+	25.9678	59.8597	0.433811
CD/RU-	16.7953	69.9032	0.240266
CD/RU-	24.892	78.2519	0.318101
CD/RU-	25.1185	68.2084	0.368261
CD/RU-	22.2309	57.5999	0.385953
CD/RU-	20.9852	62.3078	0.336799
CD/RU+	15.4931	66.0741	0.23448
CD/RU+	13.2849	69.2755	0.191769
CD/RU+	15.0967	67.3296	0.224221
CD/RU+	15.0967	60.8013	0.248296
CD/RU+	12.0393	54.7124	0.220046
CD/RU+	11.8694	69.966	0.169645
CD/RU-	15.2666	60.7385	0.25135
