# Supplementary material for: Drosophila serotonin 2A receptor signaling coordinates central metabolic processes to modulate aging in response to nutrient choice
Source: eLife. 2021 Jan 19;10:e59399. doi: 10.7554/eLife.59399 (PMC7909950; doi:10.7554/eLife.59399)
Supplement: Figure 5—source data 1. [file elife-59399-fig5-data1.xlsx]

## Sheet: C
Age (Hrs)	Tub-GS-G4_x_UAS-GDHi/CD/RUminus_Survivorship	Tub-GS-G4_x_UAS-GDHi/CD/RUplus_Survivorship	Tub-GS-G4_x_UAS-GDHi/FD/RUminus_Survivorship	Tub-GS-G4_x_UAS-GDHi/FD/RUplus_Survivorship
13	1	1	1	1
26	1	1	1	1
93.9	1	1	1	1
165.27	1	1	1	1
213.78	1	1	1	1
286.45	1	1	1	1
332.64	1	1	1	1
380.78	1	1	1	1
428.7	1	1	1	1
500.79	1	1	1	1
548.87	1	1	1	1
595.67	1	1	1	1
669.78	1	1	1	1
718.14	1	1	1	1
764.99	1	1	1	1
816.34	1	1	1	1
888.48	1	1	0.99	1
955.72	1	1	0.99	1
1007.29	1	1	0.99	0.92
1056.08	1	0.99	0.98	0.92
1127.71	0.97	0.99	0.96	0.88
1172.58	0.93	0.97	0.94	0.83
1219.93	0.86	0.9	0.91	0.79
1268.92	0.83	0.82	0.89	0.74
1340.06	0.67	0.77	0.87	0.68
1388.02	0.53	0.62	0.84	0.63
1436.77	0.42	0.54	0.8	0.56
1508.48	0.25	0.33	0.73	0.43
1555.86	0.12	0.2	0.61	0.33
1603.8	0.06	0.12	0.48	0.17
1676.14	0.03	0.04	0.25	0.06
1723.81	0	0.01	0.11	0.04
1772.53	0	0.01	0.04	0
1844.2	0	0	0	0

## Sheet: D
Group	Nutrient (ug/hr/fly)
GDHi_RUPLUS_CD/S	1.00014
GDHi_RUMINUS_CD/S	0.752548
GDHi_RUPLUS_FD	0.18342
GDHi_RUMINUS_FD	0.134015
GDHi_RUPLUS_CD/Y	0.0837113
GDHi_RUMINUS_CD/Y	0.105897
GDHi_RUPLUS_CD/S	0.673565
GDHi_RUMINUS_CD/S	0.929947
GDHi_RUPLUS_FD	0.24894
GDHi_RUMINUS_FD	0.0270317
GDHi_RUPLUS_CD/Y	0.118732
GDHi_RUMINUS_CD/Y	0.09567
GDHi_RUPLUS_CD/S	1.03373
GDHi_RUMINUS_CD/S	0.828201
GDHi_RUPLUS_FD	0.155925
GDHi_RUMINUS_FD	0.188025
GDHi_RUPLUS_CD/Y	0.284298
GDHi_RUMINUS_CD/Y	0.111221
GDHi_RUPLUS_CD/S	0.572317
GDHi_RUMINUS_CD/S	0.85386
GDHi_RUPLUS_FD	0.10395
GDHi_RUMINUS_FD	0.099981
GDHi_RUPLUS_CD/Y	0.10353
GDHi_RUMINUS_CD/Y	0.192139
GDHi_RUPLUS_CD/S	0.91704
GDHi_RUMINUS_CD/S	0.73626
GDHi_RUPLUS_FD	0.184676
GDHi_RUMINUS_FD	0.14217
GDHi_RUPLUS_CD/Y	0.114147
GDHi_RUMINUS_CD/Y	0.0497175
GDHi_RUPLUS_CD/S	1.13966
GDHi_RUMINUS_CD/S	0.980301
GDHi_RUPLUS_FD	0.00528
GDHi_RUMINUS_FD	0.113736
GDHi_RUPLUS_CD/Y	0.149663
GDHi_RUMINUS_CD/Y	0.133573
GDHi_RUPLUS_CD/S	1.14239
GDHi_RUMINUS_CD/S	0.751462
GDHi_RUMINUS_FD	0.126696
GDHi_RUPLUS_CD/Y	0.132606
GDHi_RUMINUS_CD/Y	0.0974662
GDHi_RUPLUS_CD/S	0.548695
GDHi_RUMINUS_CD/S	0.0941325
GDHi_RUPLUS_FD	0.112618
GDHi_RUMINUS_FD	0.065765
GDHi_RUPLUS_CD/Y	0.187268
GDHi_RUMINUS_CD/Y	0.07209
GDHi_RUPLUS_CD/S	0.718103
GDHi_RUMINUS_CD/S	0.92097
GDHi_RUPLUS_FD	0.135293
GDHi_RUMINUS_FD	0.1386
GDHi_RUPLUS_CD/Y	0.102804
GDHi_RUMINUS_CD/Y	0.0768337
