# Supplementary figures and images for: Drosophila serotonin 2A receptor signaling coordinates central metabolic processes to modulate aging in response to nutrient choice
Source: eLife journal article supplement (doi:10.7554/elife.59399), 2021-01-18

**A**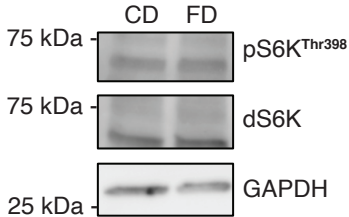**B**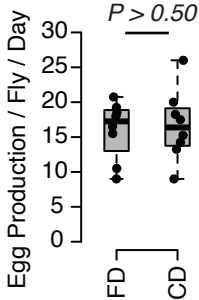

Supplement: supp [file elife_poa_e59399_Figure_1_figure_Supplement_3.pdf › elife_poa_e59399_Figure_1_figure_Supplement_3.pdf]

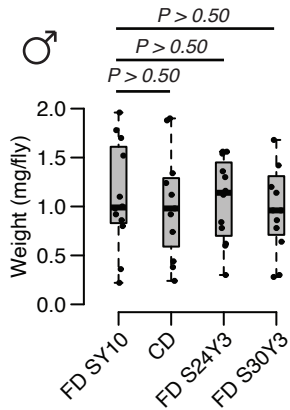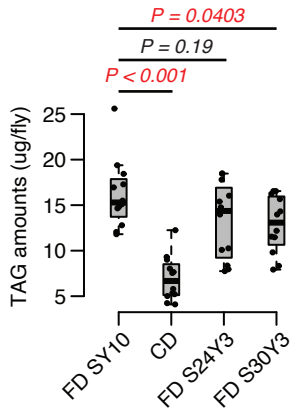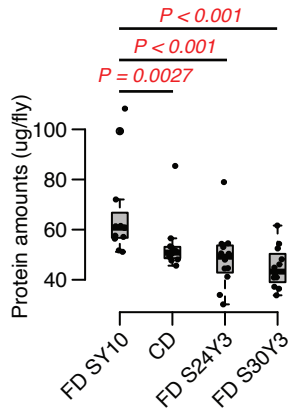

Supplement: supp [file elife_poa_e59399_Figure_1_figure_supplement_1.pdf › elife_poa_e59399_Figure_1_figure_supplement_1.pdf]

Replicate 1

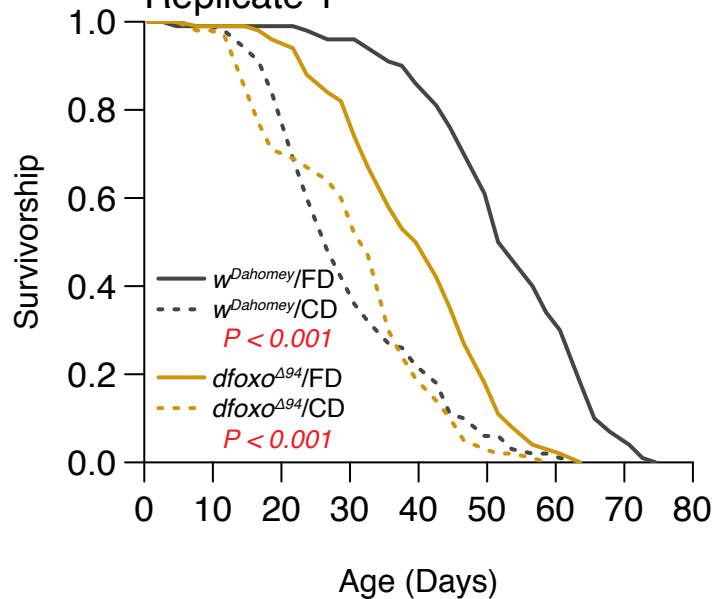

Replicate 2

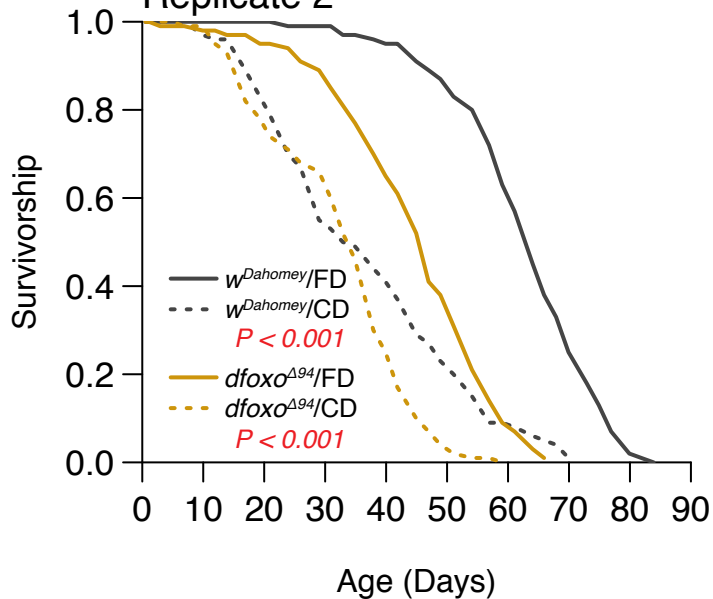

Supplement: supp [file elife_poa_e59399_Figure_1_figure_supplement_2.pdf › elife_poa_e59399_Figure_1_figure_supplement_2.pdf]

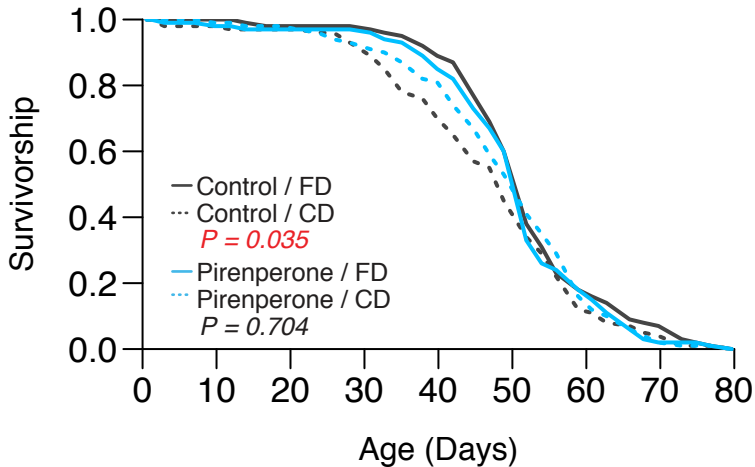

Supplement: supp [file elife_poa_e59399_Figure_2_figure_supplement_1.pdf › elife_poa_e59399_Figure_2_figure_supplement_1.pdf]

# Heads

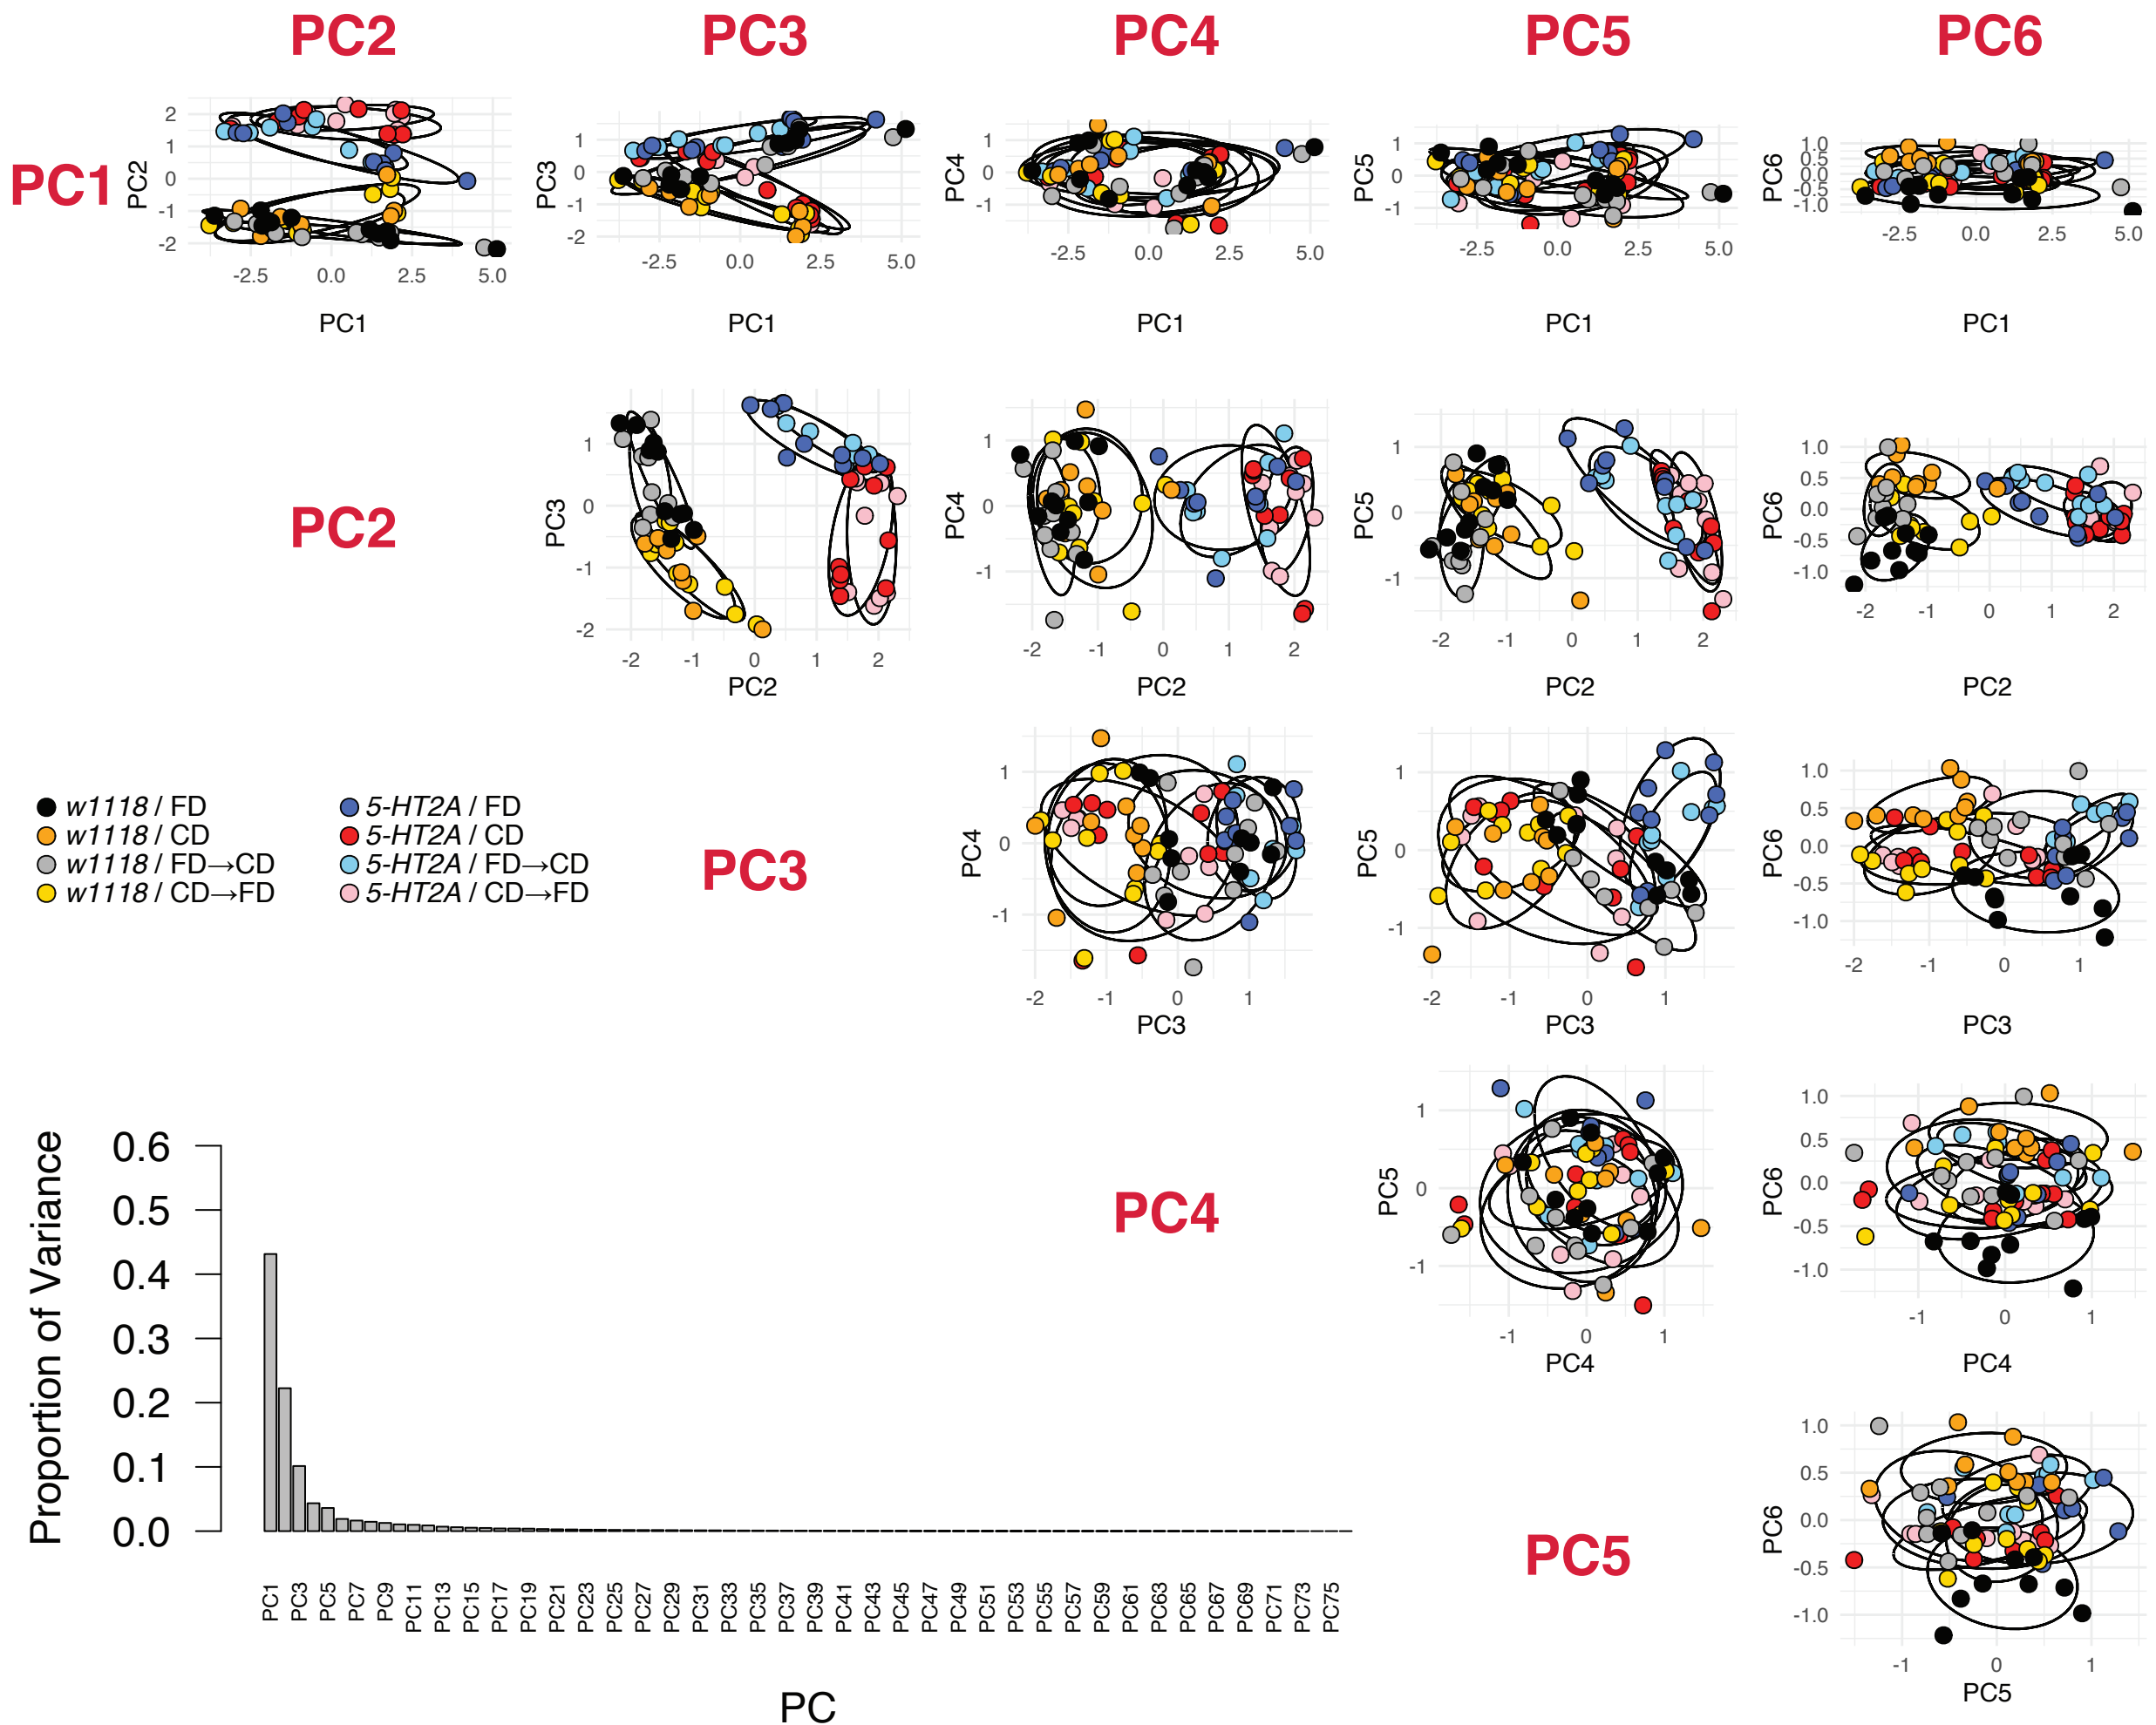

Supplement: supp [file elife_poa_e59399_Figure_3_figure_supplement_1.pdf › elife_poa_e59399_Figure_3_figure_supplement_1.pdf]

# Bodies

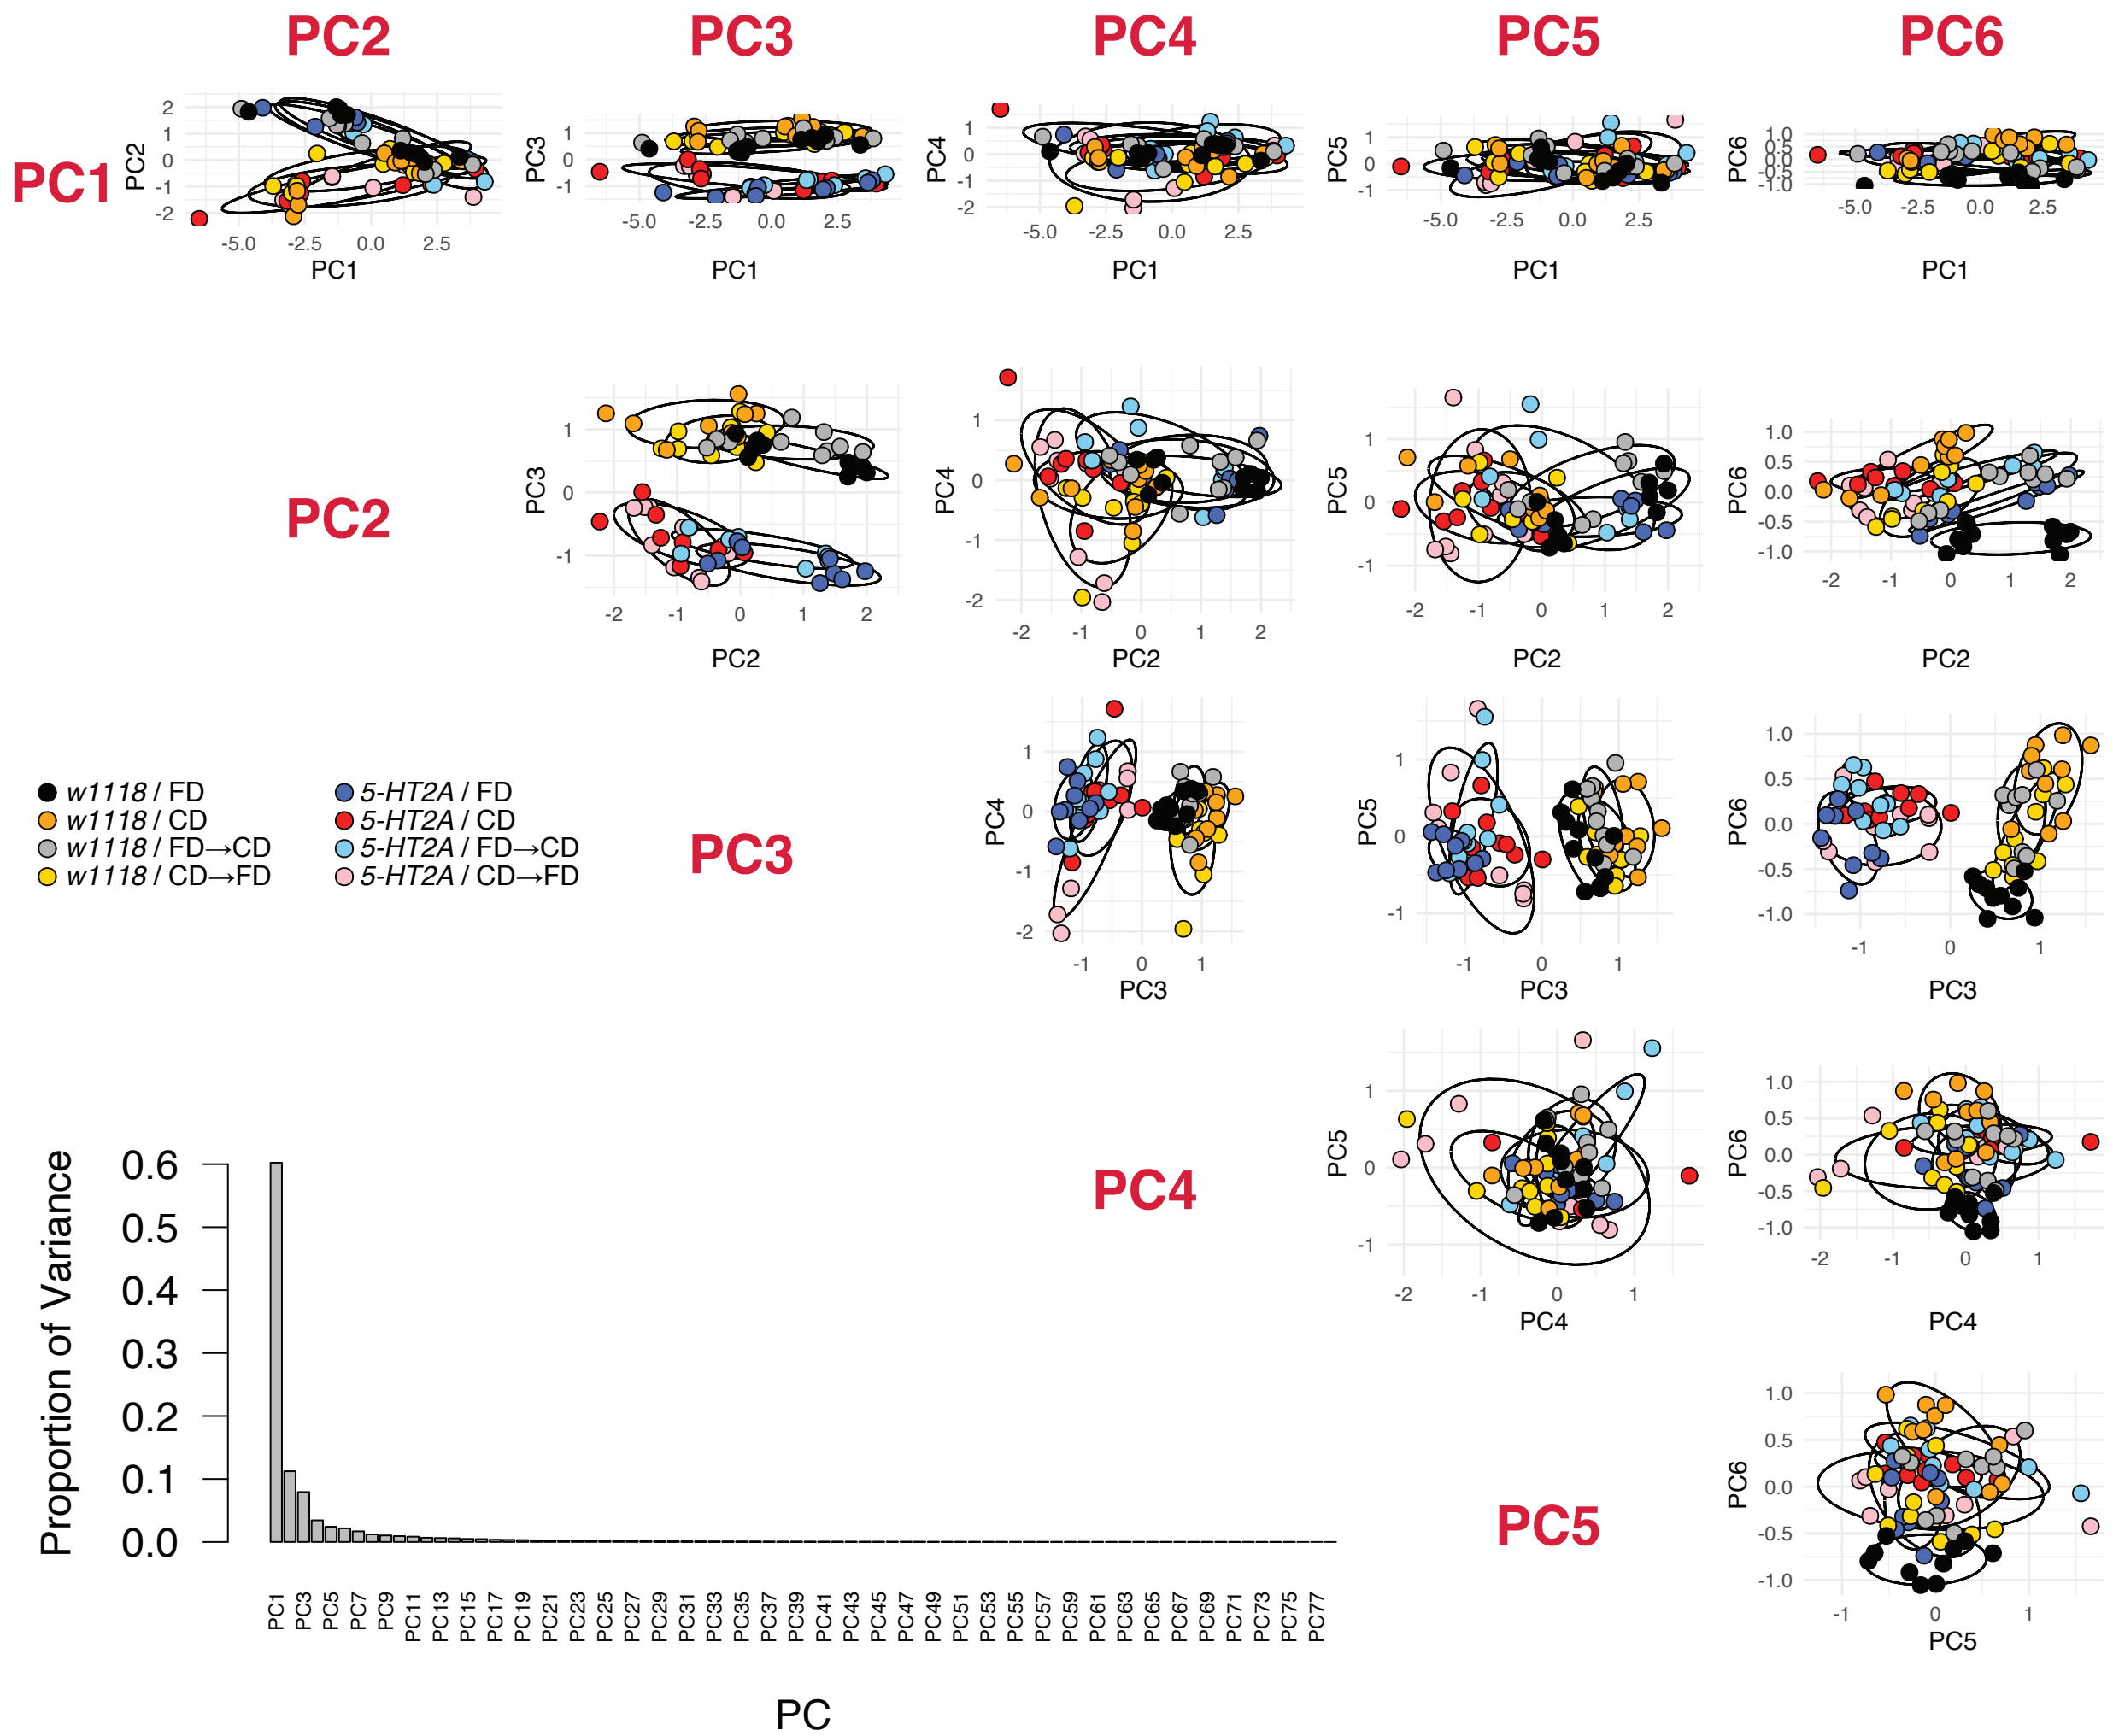

Supplement: supp [file elife_poa_e59399_Figure_3_figure_supplement_2.pdf › elife_poa_e59399_Figure_3_figure_supplement_2.pdf]

# Group C. Genotype-dependent metabolome

Heads (n=54)

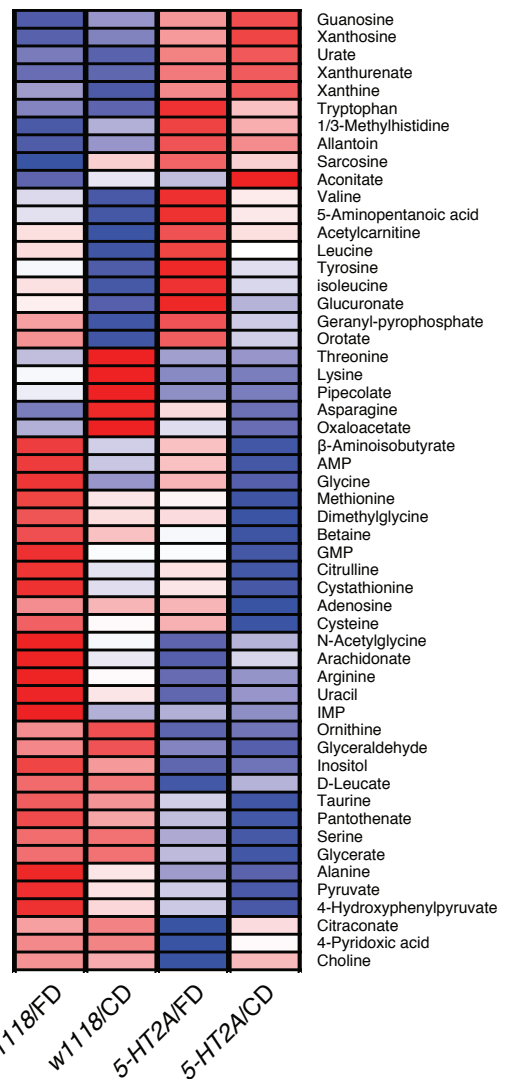

Bodies (n=43)

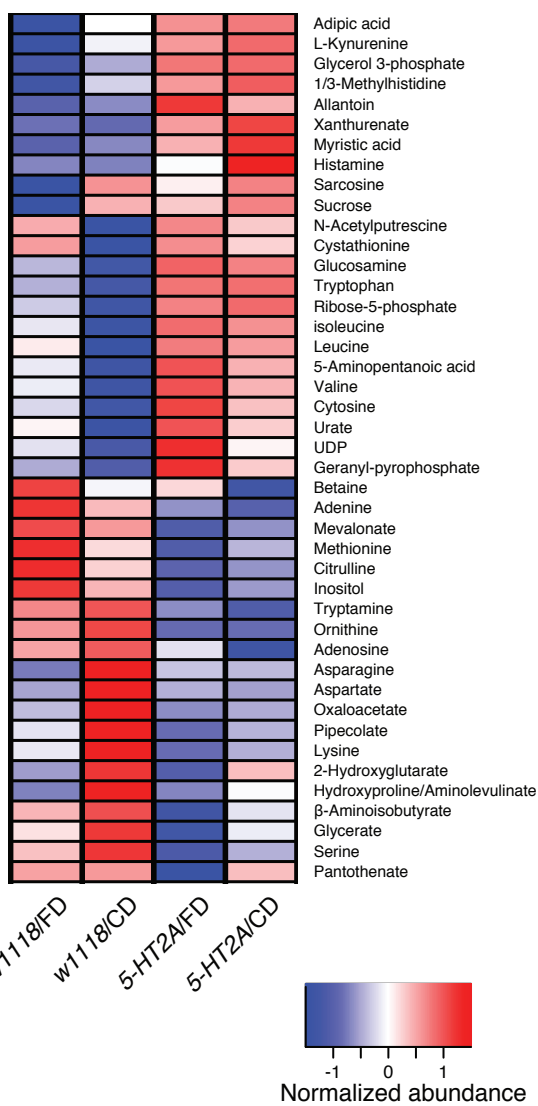

Supplement: supp [file elife_poa_e59399_Figure_3_figure_supplement_3.pdf › elife_poa_e59399_Figure_3_figure_supplement_3.pdf]

# A

## *TubGS-GAL4 X UAS-eGFP*

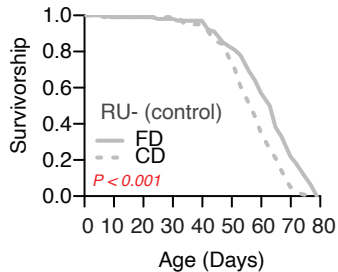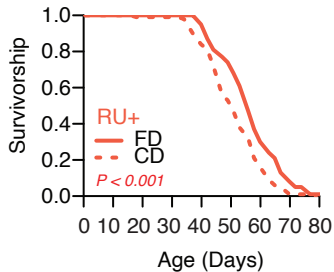

# B

## *TubGS-GAL4 X UAS-eGFP*

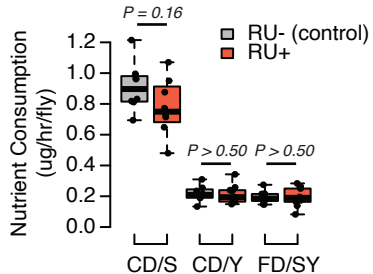

Supplement: supp [file elife_poa_e59399_Figure_5_figure_supplement_1.pdf › elife_poa_e59399_Figure_5_figure_supplement_1.pdf]

## *TubGS-GAL4 X UAS-GDH-RNAi*

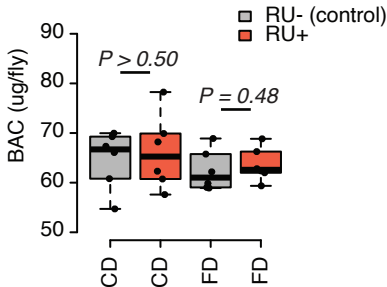

Supplement: supp [file elife_poa_e59399_Figure_5_figure_supplement_2.pdf › elife_poa_e59399_Figure_5_figure_supplement_2.pdf]
